# Supplementary material for: Polyamide 6/silica hybrid materials by a coupled polymerization reaction
Source: Royal Society of Chemistry journal article supplement (doi:10.1039/c5py00815h), 2015-01-01
Supplement: c5py00815h1.pdf [file c5py00815h1.pdf]

### Supplementary Information

L. Kaßner<sup>a</sup>, K. Nagel<sup>a</sup>, R.–E. Grützner<sup>b</sup>, M. Korb<sup>c</sup>, T. Ruffer<sup>c</sup>, H. Lang<sup>c</sup> and S. Spange<sup>a</sup>

<sup>a</sup> Polymer Chemistry, Technische Universität Chemnitz, 09107 Chemnitz, Germany.

<sup>b</sup> BASF SE, Carl-Bosch-Str. 38, 67063 Ludwigshafen am Rhein, Germany.

<sup>c</sup> Inorganic Chemistry, Technische Universität Chemnitz, 09107 Chemnitz, Germany; pertaining single X-ray structure analysis.

**Table S1** Elemental analysis and portion of extractables (48 h, MeOH) of composite **P2** repeated for nine times; Remainder% = 100 % – C% – N% – H%.

| Sample | Extractables<br>(48 h MeOH) | Quantitative elemental analysis |        |        |            |
|--------|-----------------------------|---------------------------------|--------|--------|------------|
|        |                             | C%                              | H%     | N%     | Remainder% |
| P2 (1) | 15 %                        | 61.0                            | 9.53   | 11.7   | 17.8       |
| P2 (2) | 13 %                        | 61.0                            | 9.56   | 11.8   | 17.6       |
| P2 (3) | 14 %                        | 61.4                            | 9.62   | 11.9   | 17.1       |
| P2 (4) | 16 %                        | 61.2                            | 9.60   | 11.8   | 17.4       |
| P2 (5) | 14 %                        | 60.9                            | 9.44   | 11.7   | 18.0       |
| P2 (6) | 17 %                        | 61.2                            | 9.55   | 11.7   | 17.6       |
| P2 (7) | –                           | 61.8                            | 9.67   | 11.9   | 16.6       |
| P2 (8) | –                           | 61.6                            | 9.61   | 11.8   | 17.0       |
| P2 (9) | –                           | 60.2                            | 9.39   | 11.6   | 18.8       |
|        | calculated                  | 61.7 %                          | 9.62 % | 12.0 % | 16.7 %     |

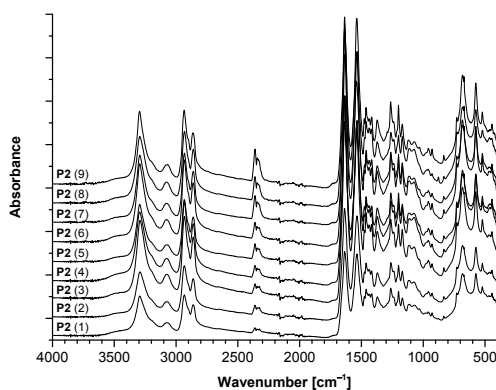

**Fig. S1** ATR-FTIR spectra of composite **P2** (extracted samples) showing repetition of synthesis procedure for nine times.

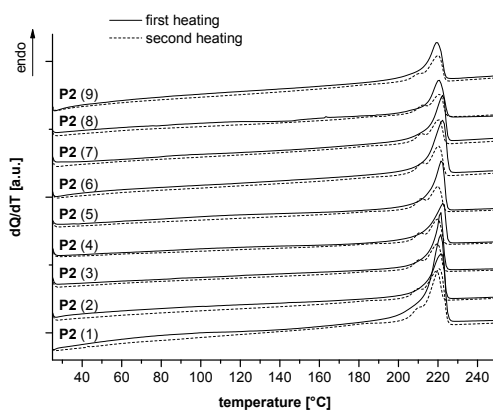

**Fig. S2** DSC traces of composite **P2**, repetition of synthesis procedure for nine times; cyclic measurements, extracted samples (48 h, MeOH).

**Table S2** Data acquisition details for the single X-ray diffraction analyses of **Si( $\epsilon$ -CL)<sub>4</sub> 1** and **Si(CHO)<sub>4</sub> 2**.

| parameter                        | Value                                                                                                              |                                                                                                                     |
|----------------------------------|--------------------------------------------------------------------------------------------------------------------|---------------------------------------------------------------------------------------------------------------------|
|                                  | <b>Si(<math>\epsilon</math>-CL)<sub>4</sub> 1</b>                                                                  | <b>Si(CHO)<sub>4</sub> 2</b>                                                                                        |
| CCDC                             | 1058156                                                                                                            | 1058182                                                                                                             |
| empiric formula                  | C <sub>24</sub> H <sub>40</sub> N <sub>4</sub> O <sub>4</sub> Si                                                   | C <sub>24</sub> H <sub>40</sub> N <sub>4</sub> O <sub>4</sub> Si                                                    |
| molecular weight                 | 476.69                                                                                                             | 476.69                                                                                                              |
| temperature                      | 110 K                                                                                                              | 110 K                                                                                                               |
| wavelength                       | 0.71073 Å                                                                                                          | 0.71073 Å                                                                                                           |
| crystal system, space group      | orthorhombic, P n a 21                                                                                             | Tetragonal, I-42d                                                                                                   |
| dimension of unit cell           | a = 18.1083(7) Å; $\alpha$ = 90 deg.<br>b = 17.6737(9) Å; $\beta$ = 90 deg.<br>c = 7.6710(3) Å; $\gamma$ = 90 deg. | a = 13.9688(3) Å; $\alpha$ = 90 deg.<br>b = 13.9688(3) Å; $\beta$ = 90 deg.<br>c = 13.3347(4) Å; $\gamma$ = 90 deg. |
| volume                           | 2455.03(18) Å <sup>3</sup>                                                                                         | 2601.97(11) Å <sup>3</sup>                                                                                          |
| Calculated density               | 1.290 mg/cm <sup>3</sup>                                                                                           | 1.217 g/cm <sup>3</sup>                                                                                             |
| Absorption coefficient           | 0.133 mm <sup>-1</sup>                                                                                             | 0.126 mm <sup>-1</sup>                                                                                              |
| F(000)                           | 1032                                                                                                               | 1032                                                                                                                |
| Crystal size                     | 0.4 x 0.4 x 0.2 mm                                                                                                 | 0.5 x 0.5 x 0.4 mm                                                                                                  |
| Theta-angle for data acquisition | 2.895 to 25.495                                                                                                    | 3.60 to 25.00                                                                                                       |
| Limiting indices                 | -21 ≤ h ≤ 21, -20 ≤ k ≤ 21, -9 ≤ l ≤ 8                                                                             | -15 ≤ h ≤ 16, -16 ≤ k ≤ 16, -15 ≤ l ≤ 15                                                                            |
| Reflections collected/unique     | 10195 / 4209 [R(int) = 0.0477]                                                                                     | 3191 / 1107 [R(int) = 0.0215]                                                                                       |
| Completeness of theta = 25.500   | 99.6 %                                                                                                             | 99.2 %                                                                                                              |
| Absorption correction            | Semi-empirical from equivalents                                                                                    | Semi-empirical from equivalents                                                                                     |
| Max. and min. transmission       | 1.00000 and 0.55157                                                                                                | 1.00000 and 0.88537                                                                                                 |
| Refinement method                | Full-matrix least squares on F <sup>2</sup>                                                                        | Full-matrix least squares on F <sup>2</sup>                                                                         |
| Data/restraints/parameters       | 4209 / 1 / 298                                                                                                     | 1107 / 0 / 75                                                                                                       |
| Goodness-of-fit                  | 1.044                                                                                                              | 1.040                                                                                                               |
| Final R indices [I > 2σ(I)]      | R1 = 0.0562, wR2 = 0.1307                                                                                          | R1 = 0.0263, wR2 = 0.0621                                                                                           |
| R indices (all data)             | R1 = 0.0705, wR2 = 0.1384                                                                                          | R1 = 0.0282, wR2 = 0.0632                                                                                           |
| Absolute structure parameter     | -0.05 (12)                                                                                                         | -0.22 (16)                                                                                                          |
| Largest diff. peak and hole      | 0.683 and -0.262 e.Å <sup>-3</sup>                                                                                 | 0.131 and -0.172 e.Å <sup>-3</sup>                                                                                  |

**Table S3** Measured bond lengths and angles in **Si( $\epsilon$ -CL)<sub>4</sub> 1**.**bond lengths in Å**

|             |          |             |          |             |          |
|-------------|----------|-------------|----------|-------------|----------|
| Si(1)–N(1)  | 1.759(4) | Si(1)–N(2)  | 1.755(4) | Si(1)–N(3)  | 1.758(4) |
| Si(1)–N(4)  | 1.760(4) | C(1)–O(1)   | 1.238(5) | C(1)–N(1)   | 1.374(5) |
| C(1)–C(2)   | 1.507(6) | C(2)–C(3)   | 1.541(6) | C(3)–C(4)   | 1.519(6) |
| C(4)–C(5)   | 1.540(6) | C(5)–C(6)   | 1.517(6) | C(6)–N(1)   | 1.517(6) |
| C(7)–O(2)   | 1.227(5) | C(7)–O(2)   | 1.368(6) | C(7)–C(8)   | 1.512(6) |
| C(8)–C(9)   | 1.534(6) | C(9)–C(10)  | 1.525(6) | C(10)–C(11) | 1.508(7) |
| C(11)–C(12) | 1.521(6) | C(12)–N(2)  | 1.475(5) | C(13)–O(3)  | 1.229(5) |
| C(13)–N(3)  | 1.373(6) | C(13)–C(14) | 1.501(6) | C(14)–C(15) | 1.527(6) |
| C(15)–C(16) | 1.517(6) | C(16)–C(17) | 1.523(6) | C(17)–C(18) | 1.516(6) |
| C(18)–N(3)  | 1.475(5) | C(19)–O(4)  | 1.231(5) | C(19)–N(4)  | 1.362(6) |
| C(19)–C(20) | 1.505(6) | C(20)–C(21) | 1.547(6) | C(21)–C(22) | 1.523(6) |
| C(22)–C(23) | 1.522(7) | C(23)–C(24) | 1.508(6) | C(24)–N(4)  | 1.475(5) |

**bond angles in °**

|                   |            |                   |            |                   |            |
|-------------------|------------|-------------------|------------|-------------------|------------|
| O(1)–C(1)–N(1)    | 119.3(4)   | O(1)–C(1)–C(2)    | 121.3(4)   | N(1)–C(1)–C(2)    | 119.3(4)   |
| C(1)–C(2)–C(3)    | 113.2(4)   | C(4)–C(3)–C(2)    | 113.8(4)   | C(3)–C(4)–C(5)    | 114.7(4)   |
| C(6)–C(5)–C(4)    | 114.5(4)   | N(1)–C(6)–C(5)    | 115.8(4)   | O(2)–C(7)–N(2)    | 120.2(4)   |
| O(2)–C(7)–C(8)    | 120.5(4)   | N(2)–C(7)–C(8)    | 119.2(4)   | C(7)–C(8)–C(9)    | 112.7(4)   |
| C(10)–C(9)–C(8)   | 114.6(4)   | C(11)–C(10)–C(9)  | 115.9(4)   | C(10)–C(11)–C(12) | 115.0(4)   |
| N(2)–C(12)–C(11)  | 114.3(4)   | O(3)–C(13)–N(3)   | 119.3(4)   | O(3)–C(13)–C(14)  | 121.3(4)   |
| N(3)–C(13)–C(14)  | 119.3(4)   | C(13)–C(14)–C(15) | 114.1(4)   | C(16)–C(15)–C(14) | 114.6(4)   |
| C(15)–C(16)–C(17) | 115.7(4)   | C(18)–C(17)–C(16) | 114.6(4)   | N(3)–C(18)–C(17)  | 115.3(3)   |
| O(4)–C(19)–N(4)   | 119.5(4)   | O(4)–C(19)–C(20)  | 120.8(4)   | N(4)–C(19)–C(20)  | 119.6(4)   |
| C(19)–C(20)–C(21) | 112.5(4)   | C(22)–C(21)–C(20) | 113.5(4)   | C(23)–C(22)–C(21) | 114.6(4)   |
| C(24)–C(23)–C(22) | 115.8(4)   | N(4)–C(24)–C(23)  | 114.9(4)   | C(1)–N(1)–C(6)    | 120.9(4)   |
| C(1)–N(1)–Si(1)   | 114.8(3)   | C(6)–N(1)–Si(1)   | 122.9(3)   | C(7)–N(2)–C(12)   | 120.7(4)   |
| C(7)–N(2)–Si(1)   | 114.6(3)   | C(12)–N(2)–Si(1)  | 123.3(3)   | C(13)–N(3)–C(18)  | 120.9(4)   |
| C(13)–N(3)–Si(1)  | 114.9(3)   | C(18)–N(3)–Si(1)  | 123.3(3)   | C(19)–N(4)–C(24)  | 120.5(4)   |
| C(19)–N(4)–Si(1)  | 114.9(3)   | C(24)–N(4)–Si(1)  | 123.4(3)   | N(2)–Si(1)–N(3)   | 109.92(16) |
| N(2)–Si(1)–N(1)   | 110.08(18) | N(3)–Si(1)–N(1)   | 108.24(19) | N(2)–Si(1)–N(4)   | 107.84(19) |
| N(3)–Si(1)–N(4)   | 110.28(17) | N(1)–Si(1)–N(4)   | 110.49(16) |                   |            |

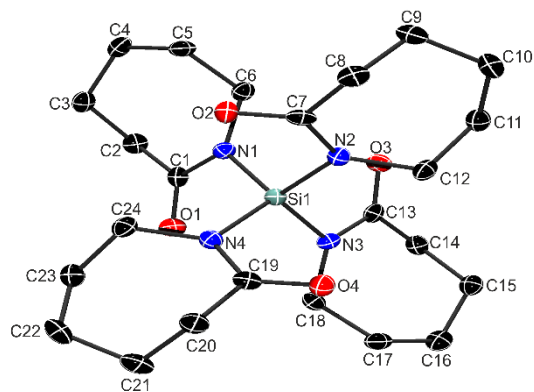

**Table S4** Measured bond lengths and angles in **Si(CHO)<sub>4</sub> 2**.

| bond lengths in Å |            | bond angles in °    |            |
|-------------------|------------|---------------------|------------|
| Si(1)–O(1)        | 1.6353(10) | (1)#1–Si(1)–O(1)#2  | 108.93(3)  |
| O(1)–N(2)         | 1.4596(15) | O(1)#1–Si(1)–O(1)#3 | 110.56(7)  |
| N(2)–C(1)         | 1.275(2)   | O(1)#2–Si(1)–O(1)#3 | 108.93(3)  |
| C(6)–C(1)         | 1.498(2)   | O(1)#1–Si(1)–O(1)   | 108.93(3)  |
| C(6)–C(5)         | 1.533(2)   | O(1)#2–Si(1)–O(1)   | 110.56(7)  |
| C(6)–H(6A)        | 0.9700     | O(1)#3–Si(1)–O(1)   | 108.93(3)  |
| C(6)–H(6B)        | 0.9700     | N(2)–O(1)–Si(1)     | 107.59(8)  |
| C(2)–C(1)         | 1.504(2)   | C(1)–N(2)–O(1)      | 111.64(12) |
| C(2)–C(3)         | 1.521(2)   | C(1)–C(6)–C(5)      | 110.78(14) |
| C(2)–H(2A)        | 0.9700     | C(1)–C(6)–H(6A)     | 109.5      |
| C(2)–H(2B)        | 0.9700     | C(5)–C(6)–H(6A)     | 109.5      |
| C(4)–C(3)         | 1.523(3)   | C(1)–C(6)–H(6B)     | 109.5      |
| C(4)–C(5)         | 1.523(3)   | C(5)–C(6)–H(6B)     | 109.5      |
| C(4)–H(4A)        | 0.9700     | H(6A)–C(6)–H(6B)    | 108.1      |
| C(4)–H(4B)        | 0.9700     | C(1)–C(2)–C(3)      | 111.70(14) |
| C(3)–H(3A)        | 0.9700     | C(1)–C(2)–H(2A)     | 109.3      |
| C(3)–H(3B)        | 0.9700     | C(3)–C(2)–H(2A)     | 109.3      |
| C(5)–H(5A)        | 0.9700     | C(1)–C(2)–H(2B)     | 109.3      |
| C(5)–H(5B)        | 0.9700     | C(3)–C(2)–H(2B)     | 109.3      |
|                   |            | H(2A)–C(2)–H(2B)    | 107.9      |
|                   |            | N(2)–C(1)–C(6)      | 127.79(13) |
|                   |            | N(2)–C(1)–C(2)      | 115.17(13) |
|                   |            | C(6)–C(1)–C(2)      | 117.04(12) |
|                   |            | C(3)–C(4)–C(5)      | 110.58(15) |
|                   |            | C(3)–C(4)–H(4A)     | 109.5      |
|                   |            | C(5)–C(4)–H(4A)     | 109.5      |
|                   |            | C(3)–C(4)–H(4B)     | 109.5      |
|                   |            | C(5)–C(4)–H(4B)     | 109.5      |
|                   |            | H(4A)–C(4)–H(4B)    | 108.1      |
|                   |            | C(4)–C(3)–C(2)      | 110.23(14) |
|                   |            | C(4)–C(3)–H(3A)     | 109.6      |
|                   |            | C(2)–C(3)–H(3A)     | 109.6      |
|                   |            | C(4)–C(3)–H(3B)     | 109.6      |
|                   |            | C(2)–C(3)–H(3B)     | 109.6      |
|                   |            | H(3A)–C(3)–H(3B)    | 108.1      |
|                   |            | C(4)–C(5)–C(6)      | 111.51(14) |
|                   |            | C(4)–C(5)–H(5A)     | 109.3      |
|                   |            | C(6)–C(5)–H(5A)     | 109.3      |
|                   |            | C(4)–C(5)–H(5B)     | 109.3      |
|                   |            | C(6)–C(5)–H(5B)     | 109.3      |
|                   |            | H(5A)–C(5)–H(5B)    | 108.0      |

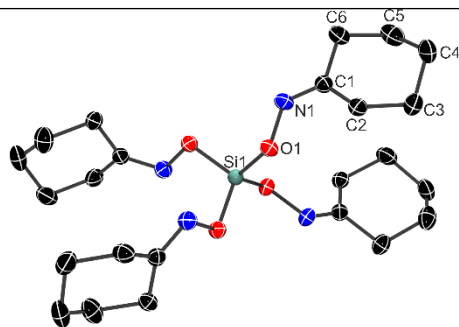

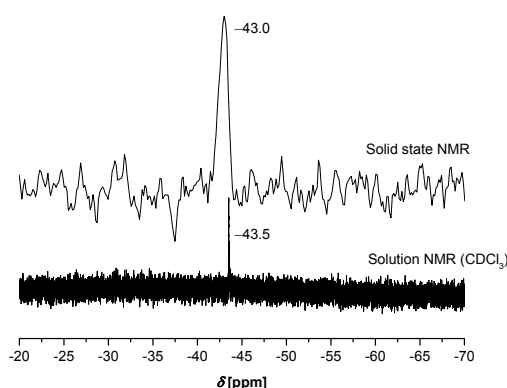

Fig. S3 solid state and solution NMR spectra of monomer 1

**Table S5** Polymerization reactions with  $\text{Si}(\text{CHO})_4$  as twin monomer with molar ratios of reactants, reaction conditions and observations.

| catalyst                                  | Molar ratios of reactants |                           |                | Reaction conditions          | Result                                                               | Extractables (EtOH) |
|-------------------------------------------|---------------------------|---------------------------|----------------|------------------------------|----------------------------------------------------------------------|---------------------|
|                                           | $\epsilon$ -ACA           | $\text{Si}(\text{CHO})_4$ | $\epsilon$ -CL |                              |                                                                      |                     |
| –                                         | 9                         | 1                         | –              | 2.5 h, 100 °C                | No reaction                                                          | –                   |
| –                                         | 4                         | 1                         | 0              | 2.5 h, 220 °C                | PA6, $\epsilon$ -CL, CHO and cyclohexanone detectable                | 36 %                |
| 50 $\mu\text{L}$ HCl                      | –                         | 1                         | 42             | 4 h, 230 °C                  | PA6 and $\epsilon$ -CL detectable<br>15 % in water insoluble residue | –                   |
| 50 $\mu\text{L}$ HCl                      | 42                        | 1                         | –              | 4 h, 230 °C                  | PA6, $\epsilon$ -CL and CHO detectable                               | 23 %                |
| 50 $\mu\text{L}$ $\text{CF}_3\text{COOH}$ | –                         | 1                         | 42             | 4 h, 230 °C                  | No reaction                                                          | –                   |
| 50 $\mu\text{L}$ HCl                      | 8                         | 1                         | –              | 1 h, 230 °C                  | PA6, $\epsilon$ -CL and CHO detectable                               | 39 %                |
| 10 $\mu\text{L}$ $\text{H}_2\text{SO}_4$  | 6.5                       | 1                         | –              | 30 min 200 °C, 10 min 220 °C | PA6, $\epsilon$ -CL and CHO detectable                               | –                   |

CHO – cyclohexanone oxime;  $\epsilon$ -CL -  $\epsilon$ -caprolactam

At high temperatures above 220 °C under usage of  $\epsilon$ -ACA PA6 as well as  $\epsilon$ -CL formation is detected, but both products were formed by  $\epsilon$ -Aminocaproic acid monomers. Therefore high extractables from hydrolysed  $\text{Si}(\text{CHO})_4$  respectively formation of cyclohexanone oxime (CHO) were observed.

**Table S6** Experimental conditions and molar ratios of the tests under usage of water in comparison to the reference experiment with  $\epsilon$ -ACA as water source.

| sample                                                                   | Molar ratios of reactants |                 |                                   |                | Reaction conditions                                                                                                                                                                                | Picture                                                                               | Extractables (48 h, MeOH) | Observation                                                                      |
|--------------------------------------------------------------------------|---------------------------|-----------------|-----------------------------------|----------------|----------------------------------------------------------------------------------------------------------------------------------------------------------------------------------------------------|---------------------------------------------------------------------------------------|---------------------------|----------------------------------------------------------------------------------|
|                                                                          | $\text{H}_2\text{O}$      | $\epsilon$ -ACA | $\text{Si}(\epsilon\text{-CL})_4$ | $\epsilon$ -CL |                                                                                                                                                                                                    |                                                                                       |                           |                                                                                  |
| Reference PA6, $\epsilon$ -ACA as water source                           | –                         | 1               | –                                 | 4.4            | 3 h, 230 °C, 8 bar                                                                                                                                                                                 |  | 10.0 %                    | PA6                                                                              |
| PA6, use of water                                                        | 1                         | –               | –                                 | 11.8           | 4 h, 230 °C, 2 bar                                                                                                                                                                                 |  | 19.0 %                    | PA6, discoloration                                                               |
| PA6/ $\text{SiO}_2$ hybrid material, use of water                        | 6.6                       | –               | 1                                 | 21.1           | Precondensation of $\epsilon$ -CL + $\text{H}_2\text{O}$ ; 2 h, 230 °C; 2.5 bar<br>Further reaction with $\text{Si}(\epsilon\text{-CL})_4$ , 2 h, 230 °C                                           |  | 25.4 %                    | PA6, high extractables, discoloration                                            |
| PA6/ $\text{SiO}_2$ /Me $\text{SiO}_{1.5}$ hybrid material, use of water | 4.4                       | 1.2             | 1.9                               | 41             | Addition of a second silicon monomer (1 equivalent); Premelting of $\epsilon$ -CL and silicon monomers, 1 h, 230 °C; Addition of $\epsilon$ -ACA/ $\text{H}_2\text{O}$ mixture, 3 h, 220 °C, 1 bar |  | 99.1 %                    | No reaction, high extractables, discoloration                                    |
| PA6/ $\text{SiO}_2$ hybrid material, use of water                        | 4                         | –               | 1                                 | 22             | 3.5 h, 230 °C, 8 bar                                                                                                                                                                               |                                                                                       | –                         | No polymeric material obtained, IR: weak Amid II-signal at 1543 $\text{cm}^{-1}$ |

**Table S7** Molar ratios of reactants and portion of extractables of polymerization procedures under variation of the order of reactant addition respectively prepolymerization temperatures.

| Molar ratios of reactants |                                  |                | Reaction conditions and order of reactant addition                              |                                                 |                                                            |                    | Extractables<br>(8 h H <sub>2</sub> O, 8 h EtOH) |
|---------------------------|----------------------------------|----------------|---------------------------------------------------------------------------------|-------------------------------------------------|------------------------------------------------------------|--------------------|--------------------------------------------------|
| $\epsilon$ -ACA           | Si( $\epsilon$ -CL) <sub>4</sub> | $\epsilon$ -CL |                                                                                 |                                                 |                                                            |                    |                                                  |
| 4.0                       | 1                                | 21.1           | $\epsilon$ -CL+ $\epsilon$ -ACA<br>1.5 h, 180 °C                                | 140 °C                                          | Si( $\epsilon$ -CL) <sub>4</sub><br>2.5 h, 220 °C, 7.5 bar |                    | 12.6 %                                           |
| 4.1                       | 1                                | 21.1           | $\epsilon$ -CL+ $\epsilon$ -ACA<br>1 h, 220 °C                                  | 180 °C                                          | Si( $\epsilon$ -CL) <sub>4</sub><br>1 h, 180 °C, 8 bar     | 2 h, 220 °C, 8 bar | 0.7 %                                            |
| 4.0                       | 1                                | 21.0           | $\epsilon$ -CL+ $\epsilon$ -ACA<br>1 h, 220 °C                                  | Si( $\epsilon$ -CL) <sub>4</sub><br>3 h, 230 °C |                                                            |                    | 6.1 %                                            |
| 4.0                       | 1                                | 11.3<br>+9.9   | $\epsilon$ -CL+ $\epsilon$ -ACA, 2 h, 200 °C, 10 bar                            |                                                 | 3 h,<br>220 °C                                             |                    | 31.3 %                                           |
|                           |                                  |                | $\epsilon$ -CL+Si( $\epsilon$ -CL) <sub>4</sub> , 1 h, 110 °C                   |                                                 |                                                            |                    |                                                  |
| 4.0                       | 1                                | 21.1           | $\epsilon$ -CL+ $\epsilon$ -ACA+Si( $\epsilon$ -CL) <sub>4</sub><br>3 h, 230 °C |                                                 |                                                            |                    | 6.6 %                                            |

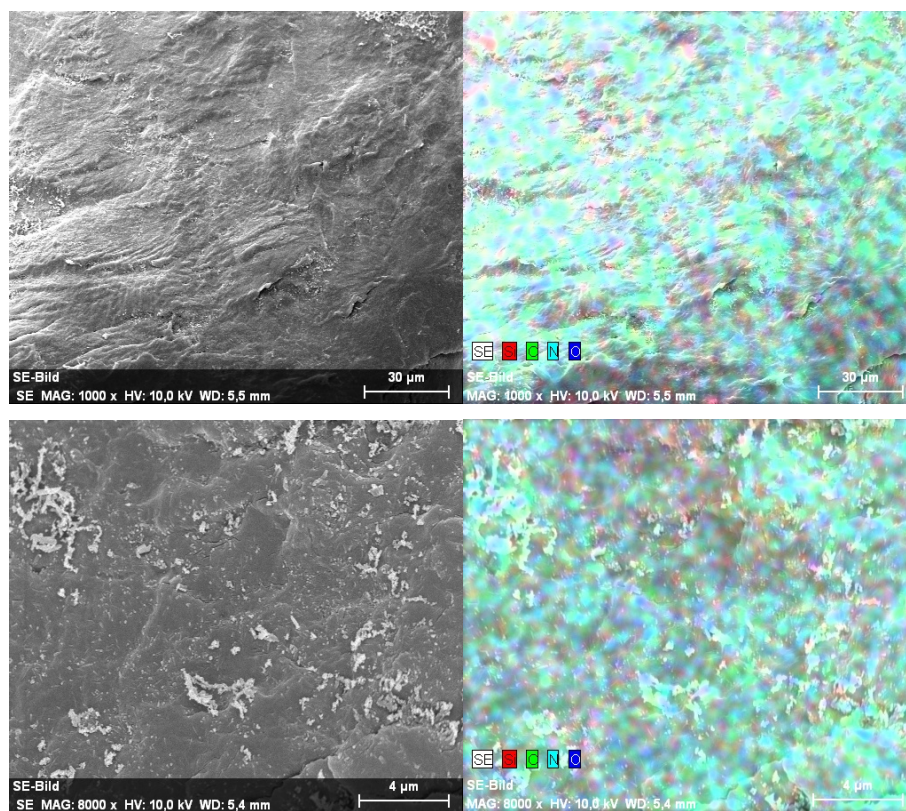

**Fig. S4** Electron microscopic images and EDX patterns of composite P1\_1 with 1 wt% of SiO<sub>2</sub> in different magnifications; EDX showing the distribution of the elements silicon, carbon, nitrogen and oxygen.



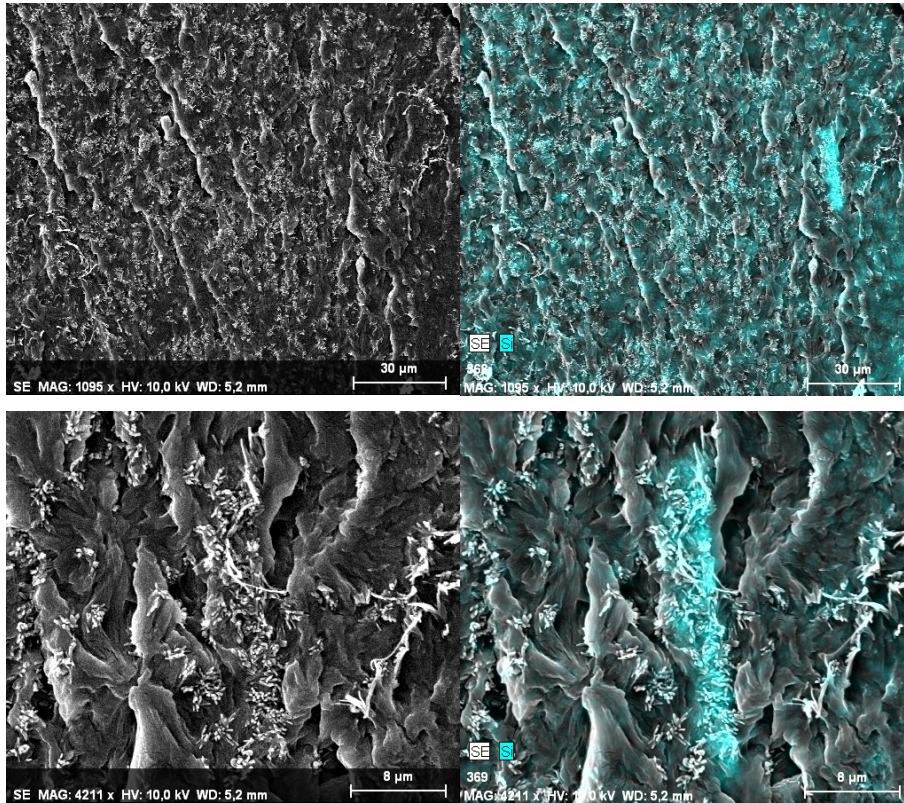

**Fig. S5** Electron microscopic images and EDX patterns of composite **P1\_2** with 1 wt% of  $\text{SiO}_2$  in different magnifications; EDX showing the distribution of the element silicon.

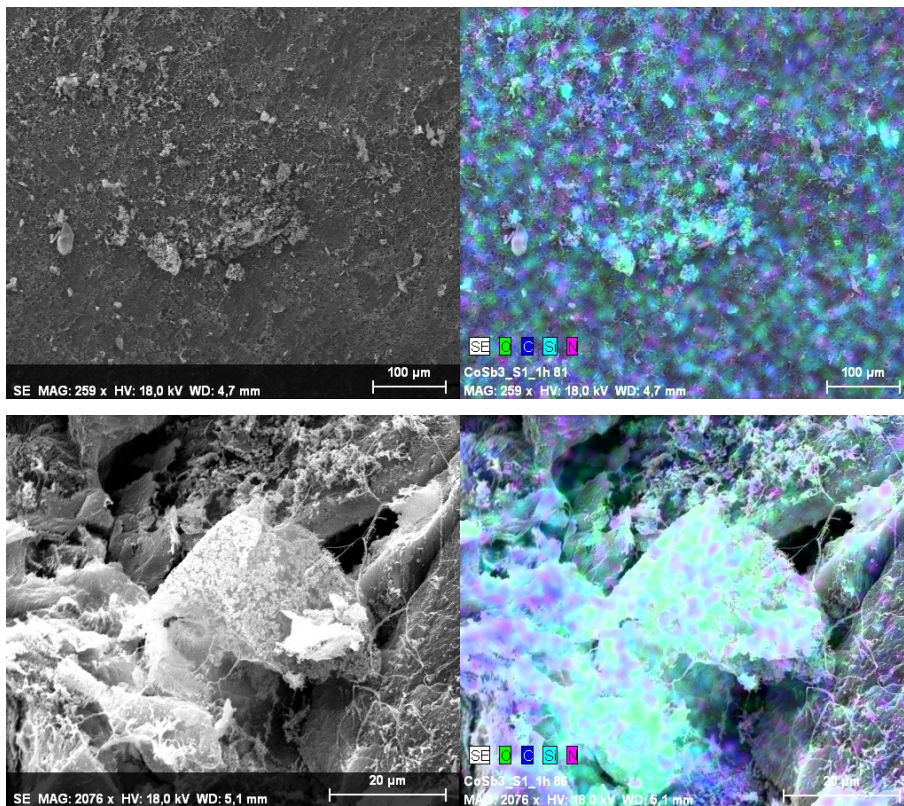

**Fig. S6** Electron microscopic images and EDX patterns of composite **P1\_3** with 1 wt% of  $\text{SiO}_2$  in different magnifications; EDX showing the distribution of the elements silicon, carbon, nitrogen and oxygen.



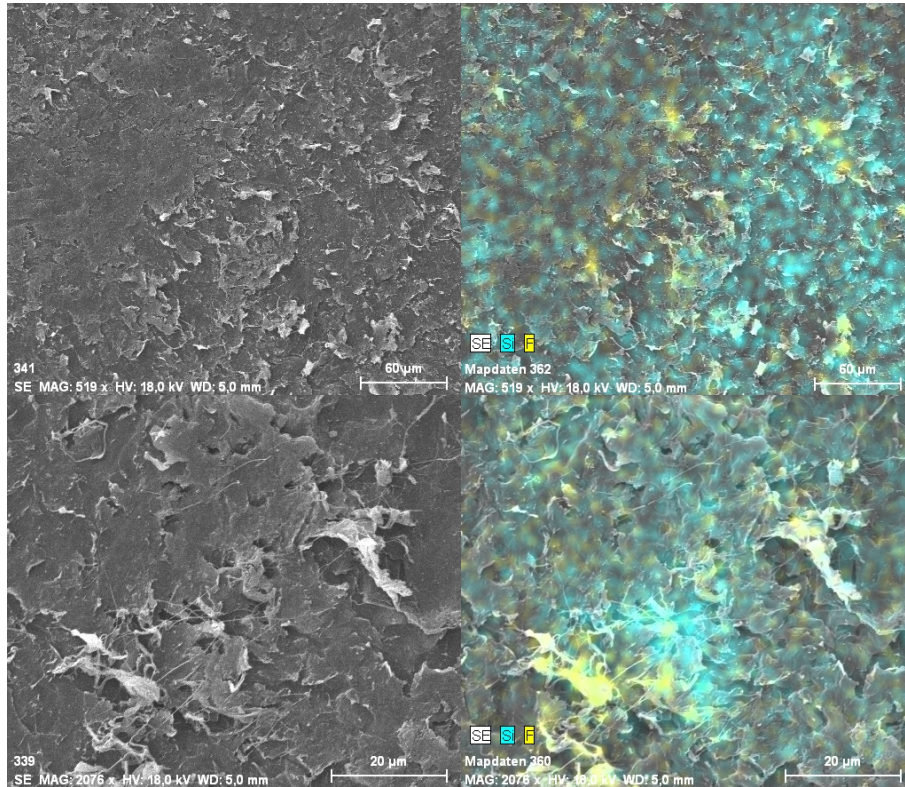

**Fig. S7** Electron microscopic images and EDX patterns of composite **P2** with 2 wt% of  $\text{SiO}_2$  in different magnifications; EDX showing the distribution of the elements silicon, carbon, nitrogen and oxygen.

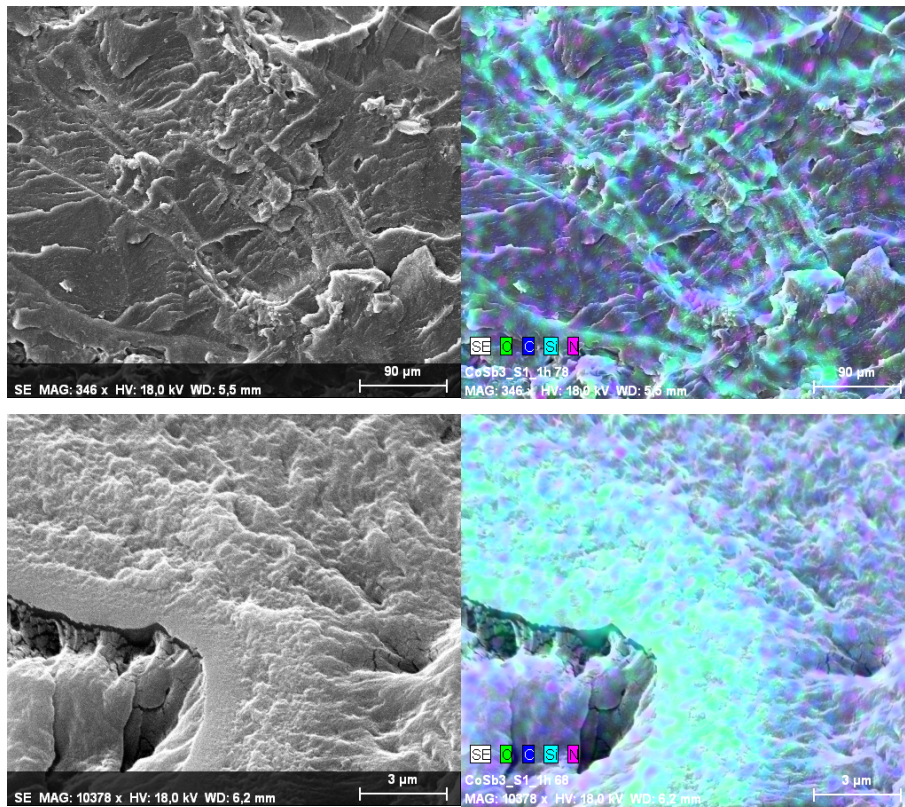

**Fig.. S8** Electron microscopic images and EDX patterns of composite **P5\_1** with 5 wt% of  $\text{SiO}_2$  in different magnifications; EDX showing the distribution of the element silicon, carbon, nitrogen and oxygen.



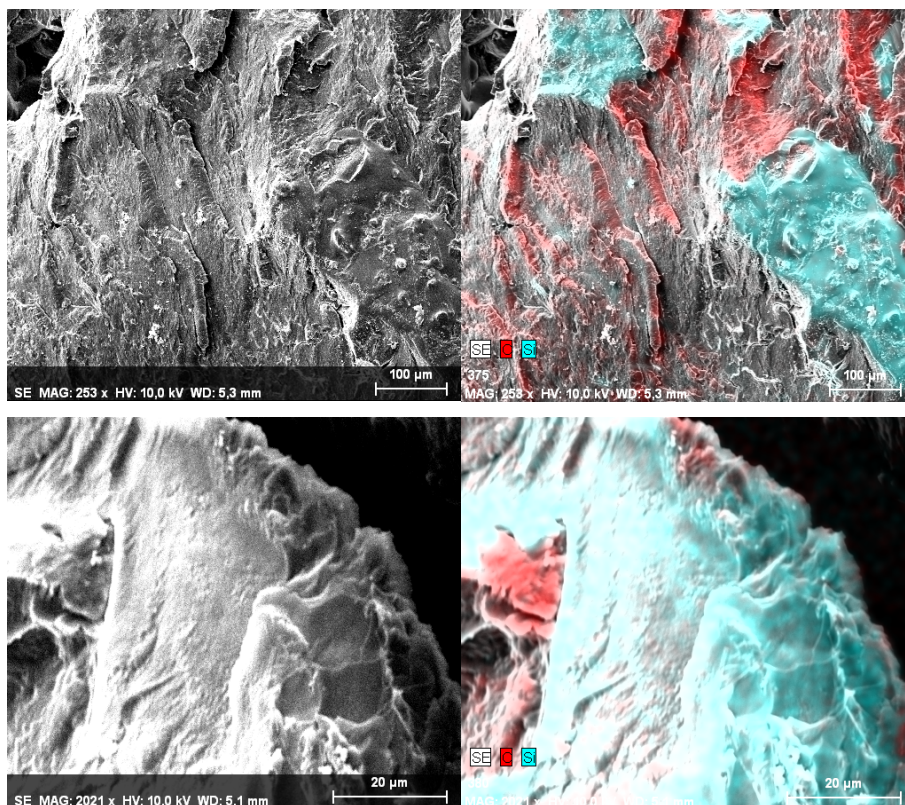

Fig. S9 Electron microscopic images and EDX patterns of composite P5\_2 with 5 wt% of SiO<sub>2</sub> in different magnifications; EDX showing the distribution of the element silicon and carbon.

Table S8 Results of cyclic DSC measurements of the PA6/SiO<sub>2</sub> composite materials.

| Sample | SiO <sub>2</sub> | 1. heating                |            |           | crystallization           |            |           | 2. heating                |            |             | $\alpha^{1-3}$ |             |
|--------|------------------|---------------------------|------------|-----------|---------------------------|------------|-----------|---------------------------|------------|-------------|----------------|-------------|
|        |                  | Int. [J·g <sup>-1</sup> ] | Onset [°C] | Peak [°C] | Int. [J·g <sup>-1</sup> ] | Onset [°C] | Peak [°C] | Int. [J·g <sup>-1</sup> ] | Onset [°C] | Peak 1 [°C] |                | Peak 2 [°C] |
| R      | 0 wt%            | 83.7                      | 213.0      | 220.5     | -65.1                     | 190.7      | 185.1     | 82.7                      | 211.8      | -           | 220.5          | 36.0        |
| P1_1   | 1 wt%            | 89.6                      | 211.7      | 220.9     | -68.2                     | 188.7      | 184.2     | 55.3                      | 211.2      | 210.8       | 219.7          | 24.3        |
| P2     | 2 wt%            | 84.4                      | 211.4      | 219.5     | -64.3                     | 190.8      | 187.3     | 84.9                      | 210.8      | 211.4       | 219.0          | 37.7        |
| P5_1   | 5 wt%            | 77.1                      | 211.5      | 219.0     | -56.7                     | 187.4      | 179.4     | 67.7                      | 211.1      | -           | 220.0          | 31.0        |

#### References

- 1 M. Schubnell, *UserCom*, 2001, **1**, 12–13.
- 2 G. W. Ehrenstein, *Polymer Werkstoffe*, Carl Hanser Verlag GmbH & Co. KG, 3. Auflage, 2011.
- 3 G. Rusu, E. Rusu, *High Perform. Polym.*, 2006, **18**, 355–375.

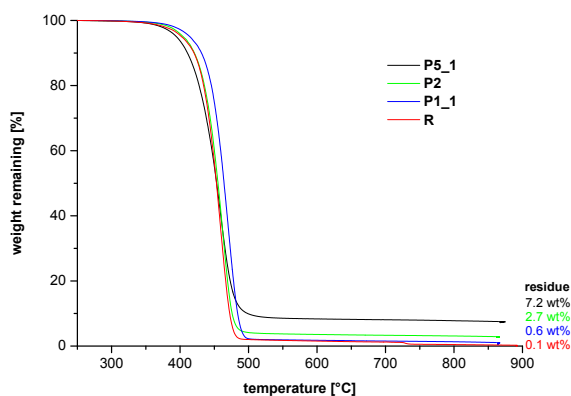

Fig. S10 TGA curves for samples with 1, 2 and 5 weight% SiO<sub>2</sub> (P1\_1, P2 and P5\_1) in comparison to polyamide 6 (R).

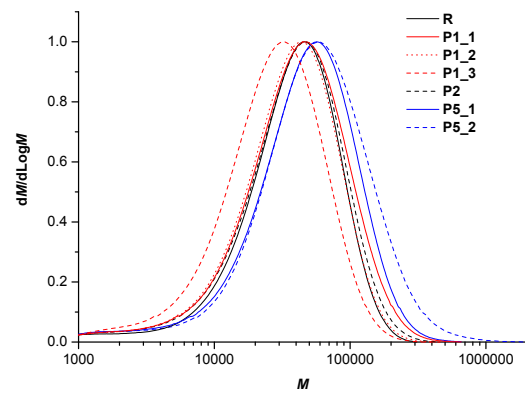

**Fig. S11** SEC profiles of composite material **P1\_x** with 1 weight% SiO<sub>2</sub>, **P2** with 2 wt% of SiO<sub>2</sub> and **P5\_x** with 5 weight% SiO<sub>2</sub> in comparison to the PA6 as reference; extracted samples (48 h, MeOH); normalized to peak height.

---
